# Supplementary material
Source: publisher figshare collection journal article supplement (https://diabetesjournals.figshare.com/articles/dataset/_/22363174)
Supplement: Supplementary file 1 [file 1]

**Supplemental Table 1:** Demographic variables at baseline among individuals with youth-onset diabetes registered by the SEARCH Study, by presence of first and second retinal image. N (%) displayed except for age (mean [standard deviation]).

|                                |                             | <i>Type 1</i> |              |                           | <i>Type 2</i> |             |                           |
|--------------------------------|-----------------------------|---------------|--------------|---------------------------|---------------|-------------|---------------------------|
|                                |                             | Total         | First Image  | Second <sup>1</sup> Image | Total         | First Image | Second <sup>1</sup> Image |
|                                |                             | n=7277        | n=2519       | n=1014                    | n=1919        | n=447       | n=239                     |
| <b>Years from diagnosis</b>    |                             |               |              |                           |               |             |                           |
| <b>Age at diagnosis, years</b> |                             | 9.9 (±4.6)    | 9.5 (±4.3)   | 9.2 (±4.4)                | 14.7 (±2.8)   | 14.3 (±2.7) | 14.2 (±2.7)               |
| <b>Sex</b>                     |                             |               |              |                           |               |             |                           |
|                                | Female                      | 3,426 (47.1)  | 1,259 (50.0) | 562 (55.4)                | 1,170 (61.0)  | 293 (65.5)  | 158 (66.1)                |
|                                | Male                        | 3,851 (52.9)  | 1,260 (50.0) | 452 (44.6)                | 749 (39.0)    | 154 (34.5)  | 81 (33.9)                 |
| <b>Race/ethnicity</b>          |                             |               |              |                           |               |             |                           |
|                                | Non-Hispanic Black          | 887 (12.2)    | 303 (12.0)   | 171 (16.9)                | 705 (36.7)    | 203 (45.4)  | 107 (44.8)                |
|                                | Hispanic                    | 922 (12.7)    | 345 (13.7)   | 204 (20.1)                | 476 (24.8)    | 111 (24.8)  | 53 (22.2)                 |
|                                | Non-Hispanic White          | 5,014 (68.9)  | 1,794 (71.2) | 601 (59.3)                | 409 (21.3)    | 86 (19.2)   | 55 (23.0)                 |
|                                | Other                       | 454 (6.2)     | 77 (3.1)     | 38 (3.7)                  | 329 (17.1)    | 47 (10.5)   | 24 (10.0)                 |
| <b>Year of diagnosis</b>       |                             |               |              |                           |               |             |                           |
|                                | 2002                        | 1,007 (13.8)  | 323 (12.8)   | 151 (14.9)                | 265 (13.8)    | 56 (12.5)   | 41 (17.2)                 |
|                                | 2003                        | 962 (13.2)    | 353 (14.0)   | 163 (16.1)                | 259 (13.5)    | 44 (9.8)    | 34 (14.2)                 |
|                                | 2004                        | 965 (13.3)    | 365 (14.5)   | 172 (17.0)                | 247 (12.9)    | 52 (11.6)   | 37 (15.5)                 |
|                                | 2005                        | 1,080 (14.8)  | 336 (13.3)   | 154 (15.2)                | 256 (13.3)    | 54 (12.1)   | 41 (17.2)                 |
|                                | 2006                        | 1,069 (14.7)  | 383 (15.2)   | 155 (15.3)                | 274 (14.3)    | 49 (11.0)   | 32 (13.4)                 |
|                                | 2008                        | 1,117 (15.3)  | 485 (19.3)   | 219 (21.6)                | 288 (15.0)    | 74 (16.6)   | 54 (22.6)                 |
|                                | 2012                        | 1,077 (14.8)  | 274 (10.9)   | 0 (0.0)                   | 330 (17.2)    | 118 (26.4)  | 0 (0.0)                   |
| <b>Site</b>                    |                             |               |              |                           |               |             |                           |
|                                | South Carolina              | 1,562 (21.5)  | 506 (20.1)   | 197 (19.4)                | 644 (33.6)    | 154 (34.5)  | 91 (38.1)                 |
|                                | Ohio                        | 959 (13.2)    | 433 (17.2)   | 167 (16.5)                | 218 (11.4)    | 82 (18.3)   | 46 (19.2)                 |
|                                | Colorado/Arizona/New Mexico | 2,234 (30.7)  | 840 (33.3)   | 316 (31.2)                | 359 (18.7)    | 87 (19.5)   | 49 (20.5)                 |
|                                | California                  | 888 (12.2)    | 303 (12.0)   | 191 (18.8)                | 471 (24.5)    | 99 (22.1)   | 43 (18.0)                 |
|                                | Washington                  | 1,634 (22.5)  | 437 (17.3)   | 143 (14.1)                | 227 (11.8)    | 25 (5.6)    | 10 (4.2)                  |

<sup>1</sup>For type 1 diabetes, all non-Hispanic black, Hispanic, and other non-White racial/ethnic groups invited for the second follow-up and a random sample of participants with non-Hispanic White race/ethnicity invited for the second follow-up visit

**Supplemental Table 2a:** Inputs for population prevalence estimation in persons with type 1 diabetes by image time period, standardized by sex and race/ethnicity. Retinopathy defined as mild or moderate non-proliferative, or proliferative diabetic retinopathy. Missing retinopathy outcomes (n=73 for at first photo and n=38 at second image) excluded from sample numerator and denominators. Population prevalence estimated using <http://krothman.org/Episheet.xls>

| Stratum                               | First retinal imaging (n=2519) |                            | Second retinal imaging (n=1014) |                           |
|---------------------------------------|--------------------------------|----------------------------|---------------------------------|---------------------------|
|                                       | Registered cases (n=7277)      | N DR/N screened (509/2446) | Registered cases (n=7277)       | N DR/N screened (511/976) |
| Female, Asian/Pacific Islander        | 103                            | 7/33 (21.2%)               | 103                             | 7/19 (36.8%)              |
| Female, Black                         | 468                            | 58/173 (33.5%)             | 468                             | 67/107 (62.6%)            |
| Female, Hispanic                      | 449                            | 40/176 (22.7%)             | 449                             | 54/112 (48.2%)            |
| Female, Native American <sup>1</sup>  | 19                             | 2/5 (40.0%)                | 19                              | 2/4 (50.0%)               |
| Female, Other <sup>1</sup>            | 36                             | 2/2 (100.0%)               | 36                              | 1/2 (50.0%)               |
| Female, Unknown <sup>1</sup>          | 79                             | 0/1 (0.0%)                 | 79                              | 0/1 (0.0%)                |
| Female, White                         | 2272                           | 158/833 (19.0%)            | 2272                            | 155/294 (52.7%)           |
| Male, Asian/Pacific Islander          | 72                             | 3/21 (14.3%)               | 72                              | 4/6 (66.7%)               |
| Male, Black                           | 419                            | 29/118 (24.6%)             | 419                             | 34/56 (60.7%)             |
| Male, Hispanic                        | 473                            | 33/162 (20.4%)             | 473                             | 49/84 (58.3%)             |
| Male, Native American <sup>2</sup>    | 23                             | 2/8 (25.0%)                | 23                              | 3/3 (100.0%)              |
| Male, Other <sup>2</sup>              | 31                             | 1/4 (25.0%)                | 31                              | 1/2 (50.0%)               |
| Male, Unknown <sup>2</sup>            | 91                             | 0/0 (0.0%)                 | 91                              | 0/0 (0.0%)                |
| Male, White                           | 2742                           | 174/910 (19.1%)            | 2742                            | 134/286 (46.9%)           |
| <b>Population prevalence (95% CI)</b> |                                | <b>0.21 (0.20, 0.23)</b>   |                                 | <b>0.52 (0.49, 0.55)</b>  |

<sup>1</sup>Combined into one group (Group 1) for standardized prevalence estimation

<sup>2</sup>Combined into one group (Group 2) for standardized prevalence estimation

**Supplemental Table 2b:** Inputs for population prevalence estimation in type 2 diabetics by image, standardized by sex and race/ethnicity. Retinopathy defined as mild or moderate non-proliferative, or proliferative diabetic retinopathy. Missing retinopathy outcomes (n=12 at first photo and n=10 at second photo) excluded from sample numerator and denominators. Population prevalence estimated using <http://krothman.org/Episheet.xls>

| Stratum                               | First retinal imaging (n=447) |                                | Second retinal imaging (n=239) |                                |
|---------------------------------------|-------------------------------|--------------------------------|--------------------------------|--------------------------------|
|                                       | Registered cases (n=1919)     | N DR/N screened (135/435)      | Registered cases (n=1919)      | N DR/N screened (126/229)      |
| Female, Asian/Pacific Islander        | 47                            | 1/7 (14.3%)                    | 47                             | 0/1 <sup>3</sup> (0.0%)        |
| Female, Black                         | 476                           | 41/142 (28.9%)                 | 476                            | 45/73 (61.6%)                  |
| Female, Hispanic                      | 276                           | 19/69 (27.5%)                  | 276                            | 16/36 (44.4%)                  |
| Female, Native American <sup>1</sup>  | 77                            | 7/17 (41.2%)                   | 77                             | 5/7 (71.4%)                    |
| Female, Other <sup>1</sup>            | 17                            | 0/1 (0.0%)                     | 17                             | 0/1 (0.0%)                     |
| Female, Unknown <sup>1</sup>          | 54                            | 0/0 (0.0%)                     | 54                             | 0/0 (0.0%)                     |
| Female, White                         | 223                           | 13/47 (27.7%)                  | 223                            | 15/34 (44.1%)                  |
| Male, Asian/Pacific Islander          | 32                            | 3/7 (42.9%)                    | 32                             | 1/2 (50.0%)                    |
| Male, Black                           | 229                           | 19/55 (34.5%)                  | 229                            | 19/27 (70.4%)                  |
| Male, Hispanic                        | 200                           | 14/39 (35.9%)                  | 200                            | 11/15 (73.3%)                  |
| Male, Native American <sup>2</sup>    | 51                            | 3/13 (23.1%)                   | 51                             | 4/12 (33.3%)                   |
| Male, Other <sup>2</sup>              | 11                            | 0/0 (0.0%)                     | 11                             | 0/0 (0.0%)                     |
| Male, Unknown <sup>2</sup>            | 40                            | 0/0 (0.0%)                     | 40                             | 0/0 (0.0%)                     |
| Male, White                           | 186                           | 15/38 (39.5%)                  | 186                            | 10/21 (47.6%)                  |
| <b>Population prevalence (95% CI)</b> |                               | <b>0.3132 (0.2675, 0.3589)</b> |                                | <b>0.5572 (0.4871, 0.6272)</b> |

<sup>1</sup>Combined into one group (Group 1) for standardized prevalence estimation

<sup>2</sup>Combined into one group (Group 2) for standardized prevalence estimation

<sup>3</sup>Added into Group 1 for prevalence estimation

**Supplemental Table 3a:** Retinopathy progression from first retinal imaging to second retinal imaging for participants with youth-onset type 1 diabetes (n=1014).

| <b>First image</b> | <b>Second image</b>        |                                                   |                                                       |                                     | <b>Missing</b> | <b>Total</b> |
|--------------------|----------------------------|---------------------------------------------------|-------------------------------------------------------|-------------------------------------|----------------|--------------|
|                    | None<br>n (%) <sup>1</sup> | Mild, non-<br>proliferative<br>n (%) <sup>1</sup> | Moderate, non-<br>proliferative<br>n (%) <sup>1</sup> | Proliferative<br>n (%) <sup>1</sup> |                |              |
| None               | 414 (55.7)                 | 306 (40.9)                                        | 27 (3.6)                                              | 2 (0.2)                             | 19             | 768          |
| Mild               | 39 (20.6)                  | 120 (63.5)                                        | 28 (14.8)                                             | 2 (1.1)                             | 13             | 202          |
| Moderate           | 0 (0.0)                    | 5 (45.5)                                          | 3 (27.3)                                              | 3 (27.3)                            | 1              | 12           |
| Proliferative      | 0 (0.0)                    | 0 (0.0)                                           | 0 (0.0)                                               | 1 (100.0)                           | 0              | 1            |
| <i>Missing</i>     | 12                         | 11                                                | 1                                                     | 2                                   | 5              | 31           |
| <b>Total</b>       | 465                        | 442                                               | 59                                                    | 10                                  | 38             | 1014         |

<sup>1</sup>Row percentages displayed, e.g., percent of none at first image that remain none at second image

**Supplemental Table 3b:** Retinopathy progression from first retinal imaging to second retinal imaging for participants with youth-onset type 2 diabetes (n=239).

| <b>First image</b> | <b>Second image</b>        |                                                   |                                                       |                                     | <b>Missing</b> | <b>Total</b> |
|--------------------|----------------------------|---------------------------------------------------|-------------------------------------------------------|-------------------------------------|----------------|--------------|
|                    | None<br>n (%) <sup>1</sup> | Mild, non-<br>proliferative<br>n (%) <sup>1</sup> | Moderate, non-<br>proliferative<br>n (%) <sup>1</sup> | Proliferative<br>n (%) <sup>1</sup> |                |              |
| None               | 90 (59.6)                  | 54 (35.8)                                         | 6 (4.0)                                               | 1 (0.6)                             | 3              | 154          |
| Mild               | 9 (14.8)                   | 34 (55.7)                                         | 14 (23.0)                                             | 4 (6.6)                             | 5              | 66           |
| Moderate           | 1 (7.7)                    | 2 (15.4)                                          | 6 (46.2)                                              | 4 (30.8)                            | 0              | 13           |
| Proliferative      | 0 (0.0)                    | 0 (0.0)                                           | 0 (0.0)                                               | 0 (0.0)                             | 0              | 0            |
| <i>Missing</i>     | 3                          | 1                                                 | 0                                                     | 0                                   | 2              | 6            |
| <b>Total</b>       | 103                        | 91                                                | 26                                                    | 9                                   | 10             | 239          |

<sup>1</sup>Row percentages displayed, e.g., percent of none at first image that remain none at second image

**Supplementary Table 4.** Associations between modifiable risk factors and diabetic retinopathy, youth-onset type 1 diabetes – The SEARCH for Diabetes in Youth Study (2002-2019). Unweighted estimates.

|                                                                | First retinal image |                      | Second retinal image |                      |
|----------------------------------------------------------------|---------------------|----------------------|----------------------|----------------------|
|                                                                | Crude RR (95% CI)   | Adjusted RR (95% CI) | Crude RR (95% CI)    | Adjusted RR (95% CI) |
| <b>Baseline A1C<sup>1</sup></b>                                | 1.16 (1.11, 1.2)    | 1.12 (1.07, 1.17)    | 1.07 (1.04, 1.10)    | 1.05 (1.03, 1.08)    |
| <b>A1C AUC<sup>2</sup></b>                                     | 1.28 (1.27, 1.30)   | 1.22 (1.16, 1.29)    | 1.06 (1.03, 1.09)    | 1.15 (1.10, 1.19)    |
| <b>BMIZ at baseline<sup>3</sup></b>                            | 1.10 (1.02, 1.19)   | 1.08 (0.99, 1.16)    | 1.07 (1.01, 1.13)    | 1.06 (1.01, 1.12)    |
| <b>BMI category (ref: normal)<sup>3</sup></b>                  |                     |                      |                      |                      |
| Overweight                                                     | 1.09 (0.89, 1.34)   | 1.09 (0.88, 1.35)    | 0.99 (0.84, 1.16)    | 0.97 (0.84, 1.12)    |
| Obese                                                          | 1.36 (1.1, 1.68)    | 1.27 (1.02, 1.58)    | 1.11 (0.95, 1.30)    | 1.08 (0.95, 1.24)    |
| <b>Waist-height ratio at baseline<sup>3,7</sup></b>            | 1.12 (0.97, 1.30)   | 1.03 (0.90, 1.20)    | 1.08 (0.98, 1.20)    | 1.07 (0.99, 1.16)    |
| <b>Change in BMI z-score<sup>4</sup></b>                       | 0.87 (0.80, 0.95)   | 0.89 (0.82, 0.97)    | 0.93 (0.88, 0.99)    | 0.95 (0.91, 0.99)    |
| <b>Change in BMI category (ref: normal/normal)<sup>4</sup></b> |                     |                      |                      |                      |
| Normal/overweight                                              | 0.87 (0.49, 1.54)   | 0.65 (0.38, 1.11)    | 1.08 (0.93, 1.27)    | 0.98 (0.87, 1.10)    |
| Overweight/normal                                              | 0.94 (0.34, 2.63)   | 0.80 (0.43, 1.48)    | 1 (0.78, 1.29)       | 0.93 (0.76, 1.14)    |
| Overweight/overweight                                          | 1.21 (1.02, 1.42)   | 1.03 (0.88, 1.22)    | 1.09 (0.94, 1.26)    | 0.95 (0.85, 1.05)    |
| <b>Change in waist-height ratio<sup>4,7</sup></b>              | 1.27 (1.12, 1.45)   | 1.23 (1.07, 1.41)    | 1.11 (1.01, 1.21)    | 1.01 (0.93, 1.10)    |
| <b>Systolic BP z-score at BL<sup>5</sup></b>                   | 1.04 (0.96, 1.13)   | 0.97 (0.89, 1.06)    | 1.00 (0.94, 1.07)    | 1.01 (0.96, 1.05)    |
| <b>Diastolic BP z-score at BL<sup>5</sup></b>                  | 1.05 (0.96, 1.15)   | 0.98 (0.89, 1.07)    | 0.98 (0.92, 1.05)    | 1.00 (0.96, 1.03)    |
| <b>Systolic BP z-score change<sup>6</sup></b>                  | 0.93 (0.86, 0.99)   | 0.88 (0.8, 0.96)     | 1.04 (0.99, 1.10)    | 1.05 (1.01, 1.09)    |
| <b>Diastolic BP z-score change<sup>6</sup></b>                 | 1.07 (0.99, 1.15)   | 1.02 (0.93, 1.12)    | 1.09 (1.04, 1.14)    | 1.08 (1.01, 1.15)    |

<sup>1</sup>Adjusted for BMI z-score at baseline, Duration since dx, Insurance status, Parent education, Race/ethnicity, Site

<sup>2</sup>Adjusted for Baseline A1C, BMI z-score at baseline, Change in BMI z-score, Duration since dx, Insurance status, Race/ethnicity, Site

<sup>3</sup>Adjusted for Baseline A1C, Duration since dx, Insurance status, Parent education, Race/ethnicity, Site

<sup>4</sup> Change in BMI category represents overweight or obesity status at first and second retinal imaging. Adjusted for BMI z-score (waist-height) at baseline, Duration since dx, Insurance status, Parent education, Race/ethnicity, Site; BMI category models don't include BMI baseline category

<sup>5</sup>Adjusted for Baseline A1C, A1C AUC, BMI z-score at baseline, Change in BMI z-score, Duration since dx, Race/ethnicity, Site

<sup>6</sup>Adjusted for Baseline A1C, A1C AUC, BMI z-score at baseline, BP z-score at baseline, Change in BMI z-score, Duration since dx, Site

<sup>7</sup>Risk ratio is for increase of 0.1

AUC=area under the curve; BMI=body mass index; SBP=systolic blood pressure; DBP=diastolic blood pressure; HS=high school; Assoc=Associate

**Supplementary Table 5.** Associations between modifiable risk factors and diabetic retinopathy, youth-onset type 2 diabetes – The SEARCH for Diabetes in Youth Study (2002-2019). Unweighted estimates.

|                                                                | First retinal image |                      | Second retinal image |                      |
|----------------------------------------------------------------|---------------------|----------------------|----------------------|----------------------|
|                                                                | Crude RR (95% CI)   | Adjusted RR (95% CI) | Crude RR (95% CI)    | Adjusted RR (95% CI) |
| <b>Baseline A1C<sup>1</sup></b>                                | 1.19 (1.14, 1.23)   | 1.20 (1.15, 1.25)    | 1.09 (1.07, 1.11)    | 1.08 (1.04, 1.12)    |
| <b>A1C AUC<sup>2</sup></b>                                     | 1.22 (1.19, 1.25)   | 1.20 (1.10, 1.30)    | 1.14 (1.11, 1.18)    | 1.14 (1.09, 1.19)    |
| <b>BMIz at baseline<sup>3</sup></b>                            | 0.95 (0.75, 1.21)   | 1.11 (0.91, 1.34)    | 1.10 (0.87, 1.40)    | 1.10 (0.89, 1.34)    |
| <b>BMI category (ref: normal)<sup>3</sup></b>                  |                     |                      |                      |                      |
| Overweight                                                     | 2.10 (0.99, 4.46)   | 2.5 (1.25, 5.03)     | 4.29 (1.18, 15.63)   | 3.57 (1.05, 12.15)   |
| Obese                                                          | 1.11 (0.54, 2.27)   | 1.61 (0.82, 3.16)    | 3.28 (0.92, 11.69)   | 2.81 (0.84, 9.42)    |
| <b>Waist-height ratio at baseline<sup>3,7</sup></b>            | 0.98 (0.86, 1.13)   | 1.03 (0.93, 1.14)    | 1.02 (0.89, 1.15)    | 1.02 (0.91, 1.15)    |
| <b>Change in BMI z-score<sup>4</sup></b>                       | 0.73 (0.59, 0.90)   | 0.74 (0.64, 0.85)    | 0.72 (0.68, 0.77)    | 0.75 (0.66, 0.86)    |
| <b>Change in BMI category (ref: normal/normal)<sup>4</sup></b> |                     |                      |                      |                      |
| Normal/overweight                                              | 3.50 (1.06, 11.51)  | 5.95 (2.14, 16.55)   | 0.33 (0.03, 3.84)    | 0.39 (0.03, 4.95)    |
| Overweight/normal                                              | 0 (0, Inf)          | 0 (0, Inf)           | 2.36 (0.46, 11.95)   | 2.66 (0.46, 15.45)   |
| Overweight/overweight                                          | 1.60 (0.65, 3.91)   | 1.92 (0.79, 4.68)    | 1.64 (0.33, 8.17)    | 1.90 (0.33, 10.89)   |
| <b>Change in waist-height ratio<sup>4,7</sup></b>              | 0.85 (0.83, 0.87)   | 0.87 (0.81, 0.93)    | 0.90 (0.78, 1.03)    | 0.81 (0.70, 0.93)    |
| <b>Systolic BP z-score at BL<sup>5</sup></b>                   | 0.98 (0.85, 1.13)   | 0.92 (0.79, 1.06)    | 1.13 (0.99, 1.28)    | 1.07 (0.96, 1.19)    |
| <b>Diastolic BP z-score at BL<sup>5</sup></b>                  | 1.09 (0.93, 1.27)   | 0.99 (0.85, 1.14)    | 1.11 (0.97, 1.28)    | 1.03 (0.93, 1.14)    |
| <b>Systolic BP z-score change<sup>6</sup></b>                  | 1.02 (0.91, 1.15)   | 1.00 (0.87, 1.15)    | 1.07 (0.99, 1.16)    | 1.10 (1.00, 1.20)    |
| <b>Diastolic BP z-score change<sup>6</sup></b>                 | 1.06 (0.93, 1.21)   | 1.09 (0.94, 1.27)    | 1.09 (0.99, 1.2)     | 1.15 (1.00, 1.33)    |

<sup>1</sup>Adjusted for BMI z-score at baseline, Duration since dx, Insurance status, Parent education, Race/ethnicity, Site

<sup>2</sup>Adjusted for Baseline A1C, BMI z-score at baseline, Change in BMI z-score, Duration since dx, Insurance status, Race/ethnicity, Site

<sup>3</sup>Adjusted for Baseline A1C, Duration since dx, Insurance status, Parent education, Race/ethnicity, Site

<sup>4</sup> Change in BMI category represents overweight or obesity status at first and second retinal imaging. Adjusted for BMI z-score (waist-height, BMI category) at baseline, Duration since dx, Insurance status, Parent education, Race/ethnicity, Site

<sup>5</sup>Adjusted for Baseline A1C, A1C AUC, BMI z-score at baseline, Change in BMI z-score, Duration since dx, Race/ethnicity, Site

<sup>6</sup>Adjusted for Baseline A1C, A1C AUC, BMI z-score at baseline, BP z-score at baseline, Change in BMI z-score, Duration since dx, Site

<sup>7</sup>Risk ratio is for an increase of 0.1 units in the modifiable exposure of interest

AUC=area under the curve; BMI=body mass index; SBP=systolic blood pressure; DBP=diastolic blood pressure; HS=high school; Assoc=Associate

**Supplementary Table 6.** Associations between modifiable risk factors and diabetic retinopathy progression, youth-onset type 1 diabetes – The SEARCH for Diabetes in Youth Study (2002-2019). Models standardized to sample of N=6200 eligible for both images using inverse probability of selection weighted model including age, sex, race, year of diagnosis, and clinic

|                                                     | Crude RR<br>(95% CI) | Adjusted<br>RR (95% CI) |
|-----------------------------------------------------|----------------------|-------------------------|
| <b>Baseline A1C<sup>1</sup></b>                     | 1.02 (0.97, 1.07)    | 1.03 (0.98, 1.09)       |
| <b>A1C AUC<sup>2</sup></b>                          | 1.21 (1.03, 1.41)    | 1.44 (1.26, 1.64)       |
| <b>BMIz at baseline<sup>3</sup></b>                 | 1.02 (0.94, 1.10)    | 1.04 (0.96, 1.13)       |
| <b>BMI category at baseline</b>                     |                      |                         |
| Normal                                              | Referent             | Referent                |
| Overweight                                          | 0.89 (0.71, 1.11)    | 0.97 (0.78, 1.20)       |
| Obese                                               | 0.97 (0.77, 1.24)    | 1.03 (0.81, 1.30)       |
| <b>Waist-height ratio at baseline<sup>3,7</sup></b> | 1.01 (0.87, 1.18)    | 1.03 (0.89, 1.19)       |
| <b>Change in BMI z-score<sup>4</sup></b>            | 0.94 (0.83, 1.06)    | 1.00 (0.89, 1.13)       |
| <b>Change in BMI category</b>                       |                      |                         |
| Normal                                              | Referent             | Referent                |
| Normal/overweight                                   | 1.11 (0.89, 1.38)    | 1.05 (0.85, 1.30)       |
| Overweight/normal                                   | 1.10 (0.77, 1.55)    | 0.91 (0.62, 1.33)       |
| Overweight/overweight                               | 0.93 (0.78, 1.12)    | 0.87 (0.71, 1.06)       |
| <b>Change in waist-height ratio<sup>4,7</sup></b>   | 1.01 (0.85, 1.21)    | 1.00 (0.85, 1.19)       |
| <b>Systolic BP z-score at baseline<sup>5</sup></b>  | 1.02 (0.94, 1.11)    | 1.05 (0.97, 1.14)       |
| <b>Diastolic BP z-score at baseline<sup>5</sup></b> | 1.06 (0.96, 1.16)    | 1.06 (0.97, 1.15)       |
| <b>Systolic BP z-score change<sup>6</sup></b>       | 1.04 (0.97, 1.11)    | 1.02 (0.94, 1.1)        |
| <b>Diastolic BP z-score change<sup>6</sup></b>      | 1.04 (0.97, 1.12)    | 1.07 (0.98, 1.16)       |

<sup>1</sup>Adjusted for BMI z-score at baseline, Duration since dx, Insurance status, Parent education, Race/ethnicity, Site

<sup>2</sup>Adjusted for Baseline A1C, BMI z-score at baseline, Change in BMI z-score, Duration since dx, Insurance status, Race/ethnicity, Site

<sup>3</sup>Adjusted for Baseline A1C, Duration since dx, Insurance status, Parent education, Race/ethnicity, Site

<sup>4</sup> Change in BMI category represents overweight or obesity status at first and second retinal imaging. Adjusted for BMI z-score (waist-height, BMI category) at baseline, Duration since dx, Insurance status, Parent education, Race/ethnicity, Site

<sup>5</sup>Adjusted for Baseline A1C, A1C AUC, BMI z-score at baseline, Change in BMI z-score, Duration since dx, Race/ethnicity, Site

<sup>6</sup>Adjusted for Baseline A1C, A1C AUC, BMI z-score at baseline, BP z-score at baseline, Change in BMI z-score, Duration since dx, Site

<sup>7</sup>Risk ratio is for an increase of 0.1 units in the modifiable exposure of interest

AUC=area under the curve; BMI=body mass index; SBP=systolic blood pressure; DBP=diastolic blood pressure; HS=high school; Assoc=Associate

**Supplementary Table 7.** Associations between modifiable risk factors and diabetic retinopathy progression, youth-onset type 2 diabetes – The SEARCH for Diabetes in Youth Study (2002-2019). Models standardized to sample of N=1589 eligible for both images using inverse probability of selection weighted model including age, sex, race, year of diagnosis, and clinic

|                                                     | Crude <sup>1</sup> RR<br>(95% CI) | Adjusted <sup>1</sup> RR<br>(95% CI) |
|-----------------------------------------------------|-----------------------------------|--------------------------------------|
| <b>Baseline A1C<sup>1</sup></b>                     | 1.04 (0.96, 1.12)                 | 1.06 (0.99, 1.14)                    |
| <b>A1C AUC<sup>2</sup></b>                          | 1.58 (1.26, 1.98)                 | 2.14 (1.53, 2.97)                    |
| <b>BMIz at baseline<sup>3</sup></b>                 | 1.27 (0.89, 1.80)                 | 1.32 (0.93, 1.90)                    |
| <b>BMI category at baseline</b>                     |                                   |                                      |
| Normal                                              | Referent                          | Referent                             |
| Overweight                                          | 2.21 (0.40, 12.10)                | 0.72 (0.14, 3.78)                    |
| Obese                                               | 3.43 (0.72, 16.34)                | 2.35 (0.66, 8.36)                    |
| <b>Waist-height ratio at baseline<sup>3,7</sup></b> | 1.04 (0.86, 1.26)                 | 1.03 (0.85, 1.25)                    |
| <b>Change in BMI z-score<sup>4</sup></b>            | 0.83 (0.55, 1.25)                 | 0.95 (0.59, 1.53)                    |
| <b>Change in BMI category</b>                       |                                   |                                      |
| Normal/normal                                       | Referent                          | Referent                             |
| Normal/overweight                                   | 0.41 (0.11, 1.58)                 | 0.51 (0.14, 1.92)                    |
| Overweight/normal                                   | 0.72 (0.28, 1.86)                 | 0.82 (0.38, 1.80)                    |
| Overweight/overweight                               | 0.59 (0.33, 1.05)                 | 0.51 (0.32, 0.79)                    |
| <b>Change in waist-height ratio<sup>4,7</sup></b>   | 0.98 (0.77, 1.26)                 | 0.96 (0.69, 1.32)                    |
| <b>Systolic BP z-score at baseline<sup>5</sup></b>  | 1.19 (0.98, 1.43)                 | 1.16 (0.97, 1.38)                    |
| <b>Diastolic BP z-score at baseline<sup>5</sup></b> | 1.06 (0.86, 1.29)                 | 1.02 (0.87, 1.21)                    |
| <b>Systolic BP z-score change<sup>6</sup></b>       | 0.97 (0.85, 1.11)                 | 0.99 (0.88, 1.11)                    |
| <b>Diastolic BP z-score change<sup>6</sup></b>      | 1.05 (0.90, 1.23)                 | 0.96 (0.81, 1.14)                    |

<sup>1</sup>Adjusted for BMI z-score at baseline, Duration since dx, Insurance status, Parent education, Race/ethnicity, Site

<sup>2</sup>Adjusted for Baseline A1C, BMI z-score at baseline, Change in BMI z-score, Duration since dx, Insurance status, Race/ethnicity, Site

<sup>3</sup>Adjusted for Baseline A1C, Duration since dx, Insurance status, Parent education, Race/ethnicity, Site

<sup>4</sup> Change in BMI category represents overweight or obesity status at first and second retinal imaging. Adjusted for BMI z-score (waist-height, BMI category) at baseline, Duration since dx, Insurance status, Parent education, Race/ethnicity, Site

<sup>5</sup>Adjusted for Baseline A1C, A1C AUC, BMI z-score at baseline, Change in BMI z-score, Duration since dx, Race/ethnicity, Site

<sup>6</sup>Adjusted for Baseline A1C, A1C AUC, BMI z-score at baseline, BP z-score at baseline, Change in BMI z-score, Duration since dx, Site

<sup>7</sup>Risk ratio is for an increase of 0.1 units in the modifiable exposure of interest

AUC=area under the curve; BMI=body mass index; SBP=systolic blood pressure; DBP=diastolic blood pressure; HS=high school; Assoc=Associate



**Supplementary Table 8.** Associations between modifiable risk factors and diabetic retinopathy progression, youth-onset type 1 diabetes – The SEARCH for Diabetes in Youth Study (2002-2019)

|                                                     | Crude RR<br>(95% CI) | Adjusted RR<br>(95% CI) |
|-----------------------------------------------------|----------------------|-------------------------|
| <b>Baseline A1C<sup>1</sup></b>                     | 1.03 (0.98, 1.09)    | 1.04 (0.98, 1.09)       |
| <b>A1C AUC<sup>2</sup></b>                          | 1.16 (0.99, 1.36)    | 1.34 (1.15, 1.55)       |
| <b>BMIz at baseline<sup>3</sup></b>                 | 1.02 (0.94, 1.10)    | 1.05 (0.96, 1.14)       |
| <b>BMI category at baseline</b>                     |                      |                         |
| Normal                                              | Referent             | Referent                |
| Overweight                                          | 0.91 (0.73, 1.13)    | 0.99 (0.80, 1.24)       |
| Obese                                               | 1.01 (0.80, 1.27)    | 1.07 (0.85, 1.35)       |
| <b>Waist-height ratio at baseline<sup>3,7</sup></b> | 0.99 (0.85, 1.15)    | 1.01 (0.87, 1.17)       |
| <b>Change in BMI z-score<sup>4</sup></b>            | 0.89 (0.79, 1.00)    | 0.94 (0.84, 1.06)       |
| <b>Change in BMI category</b>                       |                      |                         |
| Normal/normal                                       | Referent             | Referent                |
| Normal/overweight                                   | 1.10 (0.87, 1.38)    | 1.00 (0.79, 1.27)       |
| Overweight/normal                                   | 1.20 (0.86, 1.67)    | 1.02 (0.72, 1.45)       |
| Overweight/overweight                               | 1.07 (0.89, 1.29)    | 1.00 (0.82, 1.22)       |
| <b>Change in waist-height ratio<sup>4,7</sup></b>   | 1.04 (0.87, 1.24)    | 0.98 (0.82, 1.16)       |
| <b>Systolic BP z-score at baseline<sup>5</sup></b>  | 1.00 (0.92, 1.09)    | 1.02 (0.94, 1.11)       |
| <b>Diastolic BP z-score at BL<sup>5</sup></b>       | 1.01 (0.92, 1.11)    | 1.01 (0.93, 1.11)       |
| <b>Systolic BP z-score change<sup>6</sup></b>       | 1.06 (0.99, 1.13)    | 1.05 (0.97, 1.14)       |
| <b>Diastolic BP z-score change<sup>6</sup></b>      | 1.02 (0.94, 1.10)    | 1.04 (0.96, 1.14)       |

<sup>1</sup>Adjusted for BMI z-score at baseline, Duration since dx, Insurance status, Parent education, Race/ethnicity, Site

<sup>2</sup>Adjusted for Baseline A1C, BMI z-score at baseline, Change in BMI z-score, Duration since dx, Insurance status, Race/ethnicity, Site

<sup>3</sup>Adjusted for Baseline A1C, Duration since dx, Insurance status, Parent education, Race/ethnicity, Site

<sup>4</sup> Change in BMI category represents overweight or obesity status at first and second retinal imaging. Adjusted for BMI z-score (waist-height, BMI category) at baseline, Duration since dx, Insurance status, Parent education, Race/ethnicity, Site

<sup>5</sup>Adjusted for Baseline A1C, A1C AUC, BMI z-score at baseline, Change in BMI z-score, Duration since dx, Race/ethnicity, Site

<sup>6</sup>Adjusted for Baseline A1C, A1C AUC, BMI z-score at baseline, BP z-score at baseline, Change in BMI z-score, Duration since dx, Site

<sup>7</sup>Risk ratio is for an increase of 0.1 units in the modifiable exposure of interest

AUC=area under the curve; BMI=body mass index; SBP=systolic blood pressure; DBP=diastolic blood pressure; HS=high school; Assoc=Associate

**Supplementary Table 9.** Associations between modifiable risk factors and diabetic retinopathy progression, youth-onset type 2 diabetes – The SEARCH for Diabetes in Youth Study (2002-2019).

|                                                     | Crude RR<br>(95% CI) | Adjusted RR<br>(95% CI) |
|-----------------------------------------------------|----------------------|-------------------------|
| <b>Baseline A1C<sup>1</sup></b>                     | 1.05 (0.97, 1.13)    | 1.05 (0.98, 1.13)       |
| <b>A1C AUC<sup>2</sup></b>                          | 1.57 (1.27, 1.95)    | 2.09 (1.58, 2.77)       |
| <b>BMIz at baseline<sup>3</sup></b>                 | 1.42 (0.98, 2.05)    | 1.40 (0.96, 2.05)       |
| <b>BMI category at baseline</b>                     |                      |                         |
| Normal                                              | Referent             | Referent                |
| Overweight                                          | 2.86 (0.38, 21.67)   | 1.35 (0.18, 10.19)      |
| Obese                                               | 4.77 (0.72, 31.44)   | 3.42 (0.61, 19.32)      |
| <b>Waist-height ratio at baseline<sup>3,7</sup></b> | 1.10 (0.91, 1.32)    | 1.11 (0.91, 1.35)       |
| <b>Change in BMI z-score<sup>4</sup></b>            | 0.84 (0.55, 1.27)    | 0.95 (0.59, 1.54)       |
| <b>Change in BMI category</b>                       |                      |                         |
| Normal/normal                                       | Referent             | Referent                |
| Normal/overweight                                   | 0.4 (0.10, 1.55)     | 0.52 (0.15, 1.79)       |
| Overweight/normal                                   | 0.67 (0.23, 1.96)    | 0.62 (0.24, 1.58)       |
| Overweight/overweight                               | 0.66 (0.36, 1.22)    | 0.48 (0.31, 0.75)       |
| <b>Change in waist-height ratio<sup>4,7</sup></b>   | 0.97 (0.77, 1.21)    | 0.91 (0.69, 1.20)       |
| <b>Systolic BP z-score at baseline<sup>5</sup></b>  | 1.13 (0.94, 1.36)    | 1.08 (0.90, 1.30)       |
| <b>Diastolic BP z-score at baseline<sup>5</sup></b> | 1.07 (0.88, 1.31)    | 1.00 (0.85, 1.18)       |
| <b>Systolic BP z-score change<sup>6</sup></b>       | 1.00 (0.88, 1.15)    | 1.03 (0.92, 1.16)       |
| <b>Diastolic BP z-score change<sup>6</sup></b>      | 1.04 (0.88, 1.22)    | 1.01 (0.86, 1.20)       |

<sup>1</sup>Adjusted for BMI z-score at baseline, Duration since dx, Insurance status, Parent education, Race/ethnicity, Site

<sup>2</sup>Adjusted for Baseline A1C, BMI z-score at baseline, Change in BMI z-score, Duration since dx, Insurance status, Race/ethnicity, Site

<sup>3</sup>Adjusted for Baseline A1C, Duration since dx, Insurance status, Parent education, Race/ethnicity, Site

<sup>4</sup> Change in BMI category represents overweight or obesity status at first and second retinal imaging. Adjusted for BMI z-score (waist-height, BMI category) at baseline, Duration since dx, Insurance status, Parent education, Race/ethnicity, Site

<sup>5</sup>Adjusted for Baseline A1C, A1C AUC, BMI z-score at baseline, Change in BMI z-score, Duration since dx, Race/ethnicity, Site

<sup>6</sup>Adjusted for Baseline A1C, A1C AUC, BMI z-score at baseline, BP z-score at baseline, Change in BMI z-score, Duration since dx, Site

<sup>7</sup>Risk ratio is for an increase of 0.1 units in the modifiable exposure of interest

AUC=area under the curve; BMI=body mass index; SBP=systolic blood pressure; DBP=diastolic blood pressure; HS=high school; Assoc=Associate
