# Supplementary material
Source: publisher figshare collection journal article supplement (https://diabetesjournals.figshare.com/articles/dataset/_/22363174)
Supplement: Supplementary file 3 [file 1]

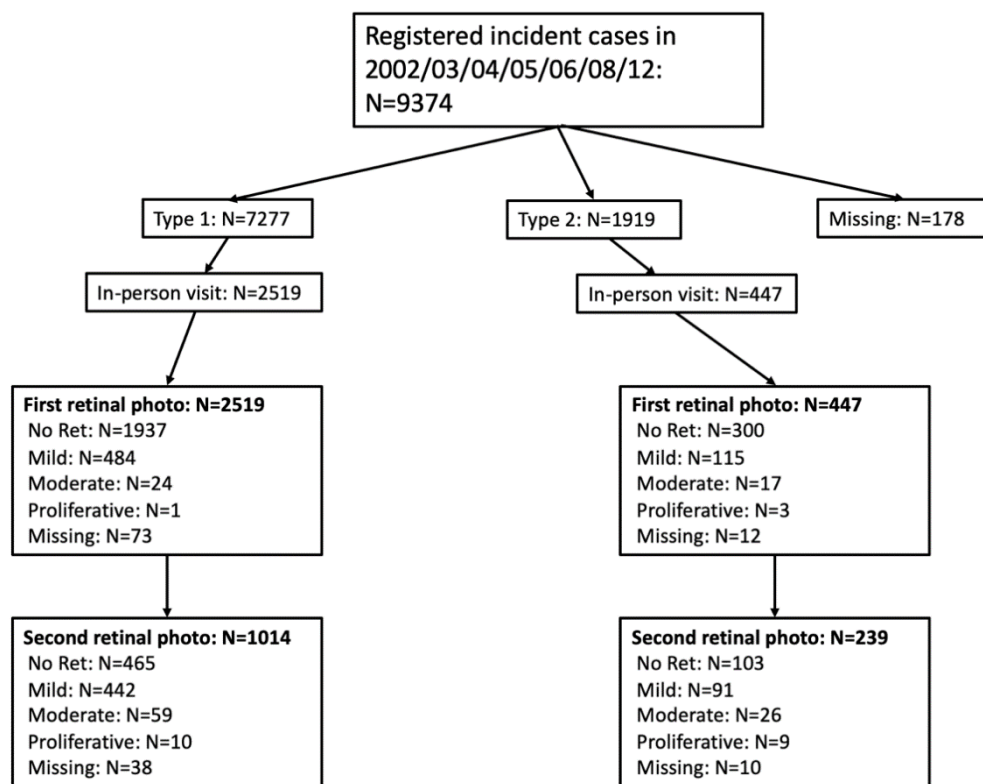

**Supplementary Figure 1.** Participant flow diagram for individuals with type 1 or type 2 diabetes  
- The SEARCH for Diabetes in Youth Study (2002-2019)
