# Supplementary material
Source: publisher figshare collection journal article supplement (https://diabetesjournals.figshare.com/articles/dataset/_/22363174)

Supplementary Figure 2. Scatterplot of BMI z-score change and A1C AUC

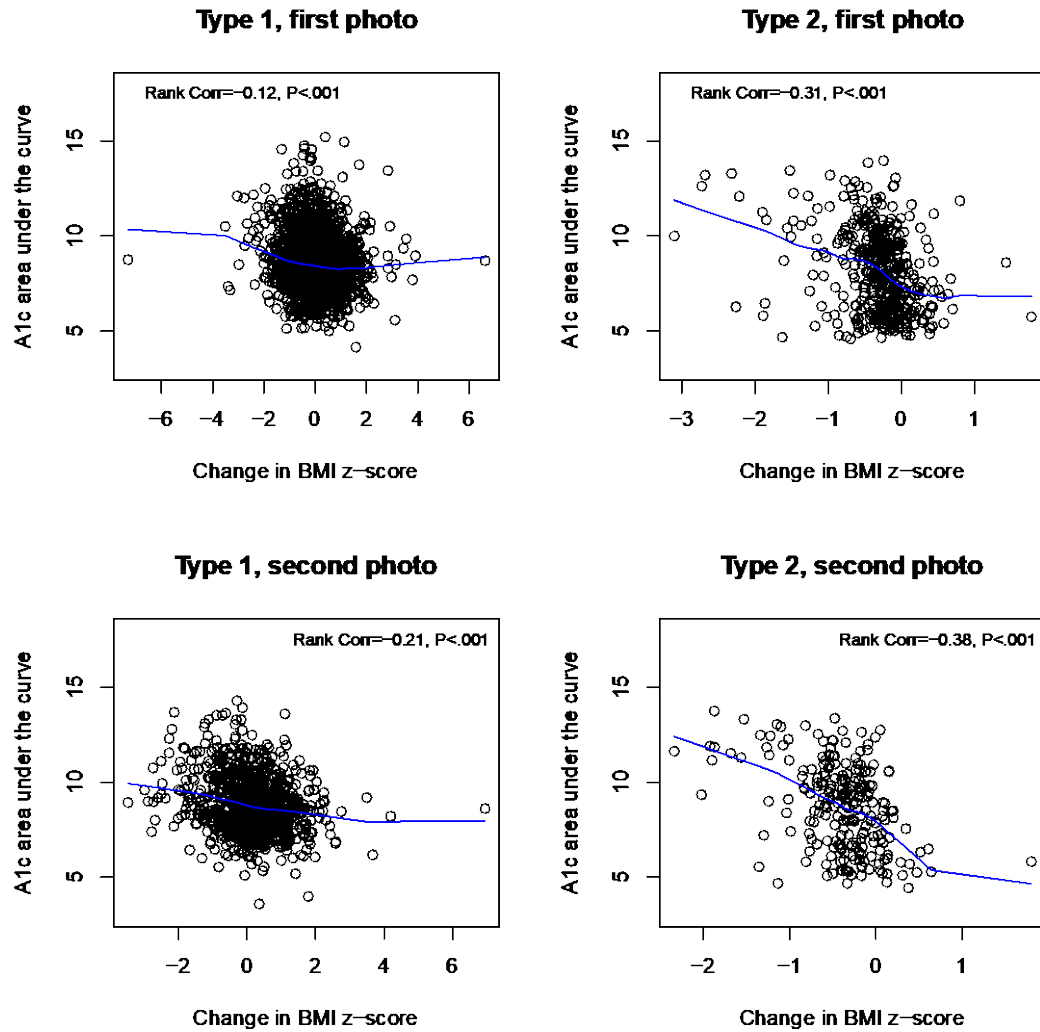

Supplement: Supplementary file 2 [file 1]
